# Supplementary material for: Characterization of UDP-Glucuronosyltransferases and the Potential Contribution to Nicotine Tolerance in Myzus persicae
Source: MDPI journal article supplement (doi:10.3390/ijms20153637), 2019-07-25
Supplement: s1 [file s1]

**Table S1. Primers used in experiments.**

| Primer name | Sequence (5'-3')      | Application   | Fragment length(bp) |
|-------------|-----------------------|---------------|---------------------|
| ActF        | GGTGTCTCACACACAGTGCC  | Real-Time PCR | 131                 |
| ActR        | CGGCGGTGGTGGTGAAGCTG  | Real-Time PCR |                     |
| AphF        | TGGTATACACGTTGGTTCTC  | Real-Time PCR | 132                 |
| AphR        | GACCACGAGCTTCCCCGGTG  | Real-Time PCR |                     |
| UGT348A3-F  | GGTCGTATCCATTCCCATC   | Real-Time PCR | 173                 |
| UGT348A3-R  | CAGTGGCGAAACTCCTACA   | Real-Time PCR |                     |
| UGT344C6-F  | CATCAGTAAACTAAACCTAAA | Real-Time PCR | 98                  |
| UGT344C6-R  | CAGCCACAGTGTCCCATC    | Real-Time PCR |                     |
| UGT344N3-F  | TTTTCATTTATTGCTCCTG   | Real-Time PCR | 88                  |
| UGT344N3-R  | GGAATCGGTTATAGTAAGGT  | Real-Time PCR |                     |
| UGT344H2-F  | GTAGCGAAGTGGCTGTTGA   | Real-Time PCR | 131                 |
| UGT344H2-R  | CTGTTGGCGTACAGTGTGTT  | Real-Time PCR |                     |
| UGT344B8-F  | CATAAAGGCATTGGCTGG    | Real-Time PCR | 140                 |
| UGT344B8-R  | AAATAGTGTTGGGGGGAG    | Real-Time PCR |                     |
| UGT350A3-F  | TATTCATTGAGATGGCTAT   | Real-Time PCR | 90                  |
| UGT350A3-R  | GCACTAAACTTATGGCTC    | Real-Time PCR |                     |
| UGT343A6-F  | AGTTTTGTGTATCGCAGCC   | Real-Time PCR | 227                 |
| UGT343A6-R  | TGACATTTCTCAGCCTTCC   | Real-Time PCR |                     |
| UGT344L3-F  | CGGGAAATGGTGCGAGAA    | Real-Time PCR | 134                 |
| UGT344L3-R  | ACCGTCAAGGAATGGCGT    | Real-Time PCR |                     |
| UGT329B4-F  | AGACATTGCCTCCGAACA    | Real-Time PCR | 153                 |
| UGT329B4-R  | TATTTTTCTCCGTTGCTCA   | Real-Time PCR |                     |
| UGT350C4-F  | ATGGATTACCGTTTACAG    | Real-Time PCR | 104                 |
| UGT350C4-R  | GGTAGAAACACCAGAATG    | Real-Time PCR |                     |
| UGT343C3-F  | TTCCTTACACTATCACTGC   | Real-Time PCR | 171                 |
| UGT343C3-R  | GTAGTTAGGCTGTGGTGTC   | Real-Time PCR |                     |
| UGT339A2-F  | TATGGTGTTGTTGCTGGA    | Real-Time PCR | 83                  |
| UGT339A2-R  | AGTGACTGTGACCGTTGTA   | Real-Time PCR |                     |
| UGT330A3-F  | GTTTCGGAAGCCCTGACG    | Real-Time PCR | 72                  |
| UGT330A3-R  | TTCCTTCGGGGACTTGGG    | Real-Time PCR |                     |
| UGT343A5-F  | ACCGTGGTCAGTTCATTC    | Real-Time PCR | 85                  |
| UGT343A5-R  | TTCTCCCTCTTGTTTTGTC   | Real-Time PCR |                     |
| UGT342B3-F  | GTCACACACTTGTTGGGC    | Real-Time PCR | 82                  |
| UGT342B3-R  | CAGATGTAGTAACGGCGA    | Real-Time PCR |                     |
| UGT349A3-F  | GTTCCCTCAGAAAACGCCTC  | Real-Time PCR | 212                 |
| UGT349A3-R  | TGATGCCGCTTTGGAGGA    | Real-Time PCR |                     |
| UGT343B3-F  | AGGAGTTGGCTCGTCGTG    | Real-Time PCR | 194                 |

|             |                         |               |     |
|-------------|-------------------------|---------------|-----|
| UGT343B3-R  | GGACAAGAGACGGGCGAA      | Real-Time PCR |     |
| UGT350C5-F  | ATCAGCAGGGTAACTCACTC    | Real-Time PCR | 118 |
| UGT350C5-R  | GTCGGATCAATGAGGAGC      | Real-Time PCR |     |
| UGT329A5-F  | TTTTTTTATTTGTAGCAGTA    | Real-Time PCR | 97  |
| UGT329A5-R  | TGACTAAAGCCTTGATGAG     | Real-Time PCR |     |
| UGT329A4-F  | TGTTCTTGCCTTACCTGCG     | Real-Time PCR | 93  |
| UGT329A4-R  | TGTCGGTAATGTTTCGGGTG    | Real-Time PCR |     |
| UGT344M3-F  | AACAGTTCGGGTTCGGTGGT    | Real-Time PCR | 157 |
| UGT344M3-R  | TAAAACGGCTCAAGCAGGA     | Real-Time PCR |     |
| UGT344M4-F  | CATCCCCACAGTATCTCCG     | Real-Time PCR | 163 |
| UGT344M4-R  | TTTCCGTGTAGTTCTCCCG     | Real-Time PCR |     |
| UGT342C3-F  | AGCATCACCTTGGGAAACG     | Real-Time PCR | 171 |
| UGT342C3-R  | GAGGCAAGCAACTCCGTGA     | Real-Time PCR |     |
| UGT344F5-F  | GTTTACACCCCGTTCCCG      | Real-Time PCR | 100 |
| UGT344F5-R  | TAGTGGCGTCCGTGTGGT      | Real-Time PCR |     |
| UGT344F4-F  | CGAAGTGCCCTCGTGTA       | Real-Time PCR | 141 |
| UGT344F4-R  | AGTCGCCTGGCTAAAGTGTC    | Real-Time PCR |     |
| UGT344E7-F  | GTTTACACCATTTCTGA       | Real-Time PCR | 157 |
| UGT344E7-R  | TAAGTTACGATTAGTCCTC     | Real-Time PCR |     |
| UGT345A3-F  | TTGTCAACACGCATCACTC     | Real-Time PCR | 125 |
| UGT345A3-R  | GTCTATCACATCTGCTAAATCTC | Real-Time PCR |     |
| UGT341A5-F  | TGACAATCTTTGGTAGCGG     | Real-Time PCR | 159 |
| UGT341A5-R  | AAAAAGGGCTGACTACGGT     | Real-Time PCR |     |
| UGT341A6-F  | CCACCACTCCGTATCGTA      | Real-Time PCR | 146 |
| UGT341A6-R  | TGAAGTAGATCGCCCAT       | Real-Time PCR |     |
| UGT344B6-F  | TATGTTTGCTTGTTCTGTG     | Real-Time PCR | 85  |
| UGT344B6-R  | CCATTGACTTTTACCTCCT     | Real-Time PCR |     |
| UGT344A12-F | AATGGCACCATTGTTAGC      | Real-Time PCR | 105 |
| UGT344A12-R | CACAGCCCGACCGAGTAG      | Real-Time PCR |     |
| UGT344B7-F  | CTCGTGGATACCTGCCCC      | Real-Time PCR | 108 |
| UGT344B7-R  | TCCACCAATGCCCGAAGA      | Real-Time PCR |     |
| UGT344A13-F | GCCGTTCATAGATGGGGAC     | Real-Time PCR | 158 |
| UGT344A13-R | CTCCACAGTTGGTCTTAGTCG   | Real-Time PCR |     |
| UGT344D5-F  | ATGGCGACGACGAAGAGA      | Real-Time PCR | 187 |
| UGT344D5-R  | GCGTGAAAACCGTGACCT      | Real-Time PCR |     |
| UGT344D7-F  | ACTTGATGGCTTCGGGGG      | Real-Time PCR | 358 |
| UGT344D7-R  | TTCTGGAAGATGATGGTGGG    | Real-Time PCR |     |
| UGT344D8-F  | GGTATACGGCAACCAAAAA     | Real-Time PCR | 94  |
| UGT344D8-R  | ACAGTCAAAGCCCAACGG      | Real-Time PCR |     |
| UGT344D9-F  | CGACAATGCTCACCTTCTCT    | Real-Time PCR | 120 |
| UGT344D9-R  | TGTTGGCGAACCTCTGGAC     | Real-Time PCR |     |

|               |                                               |                 |     |
|---------------|-----------------------------------------------|-----------------|-----|
| UGT348A3-dsF1 | GGTGtaatacgactcactataggAGTATTAGTTTATGGGAAGGGG | dsRNA synthesis | 554 |
| UGT348A3-dsR1 | CGGACTGTAGGAGTTTCGC                           | dsRNA synthesis |     |
| UGT348A3-dsF2 | AGTATTAGTTTATGGGAAGGGG                        | dsRNA synthesis |     |
| UGT348A3-dsR2 | GGTGtaatacgactcactataggCGGACTGTAGGAGTTTCGC    | dsRNA synthesis |     |
| UGT330A3-dsF1 | GGTGtaatacgactcactataggAACGGTTACCTGAAAGAGATGC | dsRNA synthesis | 712 |
| UGT330A3-dsR1 | CGTCCTCCCATTTCCACAA                           | dsRNA synthesis |     |
| UGT330A3-dsF2 | AACGGTTACCTGAAAGAGATGC                        | dsRNA synthesis |     |
| UGT330A3-dsR2 | GGTGtaatacgactcactataggCGTCCTCCCATTTCCACAA    | dsRNA synthesis |     |
| UGT339A2-dsF1 | GGTGtaatacgactcactataggCACGCTTCCGCCAGTCATCA   | dsRNA synthesis | 681 |
| UGT339A2-dsR1 | CCCTTCAACAACGAACCAAA                          | dsRNA synthesis |     |
| UGT339A2-dsF2 | CACGCTTCCGCCAGTCATCA                          | dsRNA synthesis |     |
| UGT339A2-dsR2 | GGTGtaatacgactcactataggCCCTTCAACAACGAACCAAA   | dsRNA synthesis |     |
| UGT350A3-dsF1 | GGTGtaatacgactcactataggATTCTGGGTACAAAGATCACA  | dsRNA synthesis | 525 |
| UGT350A3-dsR1 | TAGGGTGCCCAAGAATGTC                           | dsRNA synthesis |     |
| UGT350A3-dsF2 | ATTCTGGGTACAAAGATCACA                         | dsRNA synthesis |     |
| UGT350A3-dsR2 | GGTGtaatacgactcactataggTAGGGTGCCCAAGAATGTC    | dsRNA synthesis |     |
| UGT349A3-dsF1 | GGTGtaatacgactcactataggAAATCACCCAAGCCCATAC    | dsRNA synthesis | 587 |
| UGT349A3-dsR1 | GTTCTCAAGTGTTCGCCC                            | dsRNA synthesis |     |
| UGT349A3-dsF2 | AAATCACCCAAGCCCATAC                           | dsRNA synthesis |     |
| UGT349A3-dsR2 | GGTGtaatacgactcactataggGTTCTCAAGTGTTCGCCC     | dsRNA synthesis |     |
| UGT343C3-dsF1 | GGTGtaatacgactcactataggAATCTTACCGTAGTCAGCAC   | dsRNA synthesis | 617 |
| UGT343C3-dsR1 | GGTCTTGTTACACCGATACTG                         | dsRNA synthesis |     |
| UGT343C3-dsF2 | AATCTTACCGTAGTCAGCAC                          | dsRNA synthesis |     |
| UGT343C3-dsR2 | GGTGtaatacgactcactataggGGTCTTGTTACACCGATACTG  | dsRNA synthesis |     |
| UGT342B3-dsF1 | GGTG taatacgactcactataggATCGCCGTTACTACATCTG   | dsRNA synthesis | 712 |
| UGT342B3-dsR1 | CGTTTGCTATGTTTCTGTGT                          | dsRNA synthesis |     |
| UGT342B3-dsF2 | ATCGCCGTTACTACATCTG                           | dsRNA synthesis |     |
| UGT342B3-dsR2 | GGTGtaatacgactcactataggCGTTTGCTATGTTTCTGTGT   | dsRNA synthesis |     |
| UGT344D5-dsF1 | GGTGtaatacgactcactataggCGCAACATTCGTCCAGAGG    | dsRNA synthesis | 454 |
| UGT344D5-dsR1 | TTCTCGTTGAGGAAACCATT                          | dsRNA synthesis |     |
| UGT344D5-dsF2 | CGCAACATTCGTCCAGAGG                           | dsRNA synthesis |     |
| UGT344D5-dsR2 | GGTGtaatacgactcactataggTTCTCGTTGAGGAAACCATT   | dsRNA synthesis |     |
| UGT344D8-dsF1 | GGTGtaatacgactcactataggCGTTGGGCTTTGACTGTGT    | dsRNA synthesis | 575 |
| UGT344D8-dsR1 | CGGTTTGTCCTTCATTTTCG                          | dsRNA synthesis |     |
| UGT344D8-dsF2 | CGTTGGGCTTTGACTGTGT                           | dsRNA synthesis |     |
| UGT344D8-dsR2 | GGTGtaatacgactcactataggCGGTTTGTCCTTCATTTTCG   | dsRNA synthesis |     |
| UGT341A6-dsF1 | GGTGtaatacgactcactataggTAAAGATGTCGGACCTGGG    | dsRNA synthesis | 502 |
| UGT341A6-dsR1 | GGCAATTGTAAATCTGCAACA                         | dsRNA synthesis |     |
| UGT341A6-dsF2 | TAAAGATGTCGGACCTGGG                           | dsRNA synthesis |     |
| UGT341A6-dsR2 | GGTGtaatacgactcactataggGGCAATTTGTAATCTGCAACA  | dsRNA synthesis |     |
| DsECP-F1      | GGTGtaatacgactcactataggTTACGCCAAGCTTGCATGCCT  | dsRNA synthesis | 732 |

|           |                                               |                 |
|-----------|-----------------------------------------------|-----------------|
| DsECFP-R1 | ACTCCAGCAGGACCATGTGATC                        | dsRNA synthesis |
| DsECFP-F2 | TTACGCCAAG CTTGCATGCCT                        | dsRNA synthesis |
| DsECFP-R2 | GGTGtaatacgactcactataggACTCCAGCAGGACCATGTGATC | dsRNA synthesis |

Act: actin; Aph: *para* (a voltage-gated sodium channel); dsRNA, double-stranded RNA; F, forward; ORF, open reading frame; R, reverse. Lower-case indicates the T7 RNA polymerase promoter.
